# Supplementary material for: Nocturnal Birds of Prey as Carriers of Staphylococcus aureus and Other Staphylococci: Diversity, Antimicrobial Resistance and Clonal Lineages
Source: MDPI journal article supplement (doi:10.3390/antibiotics11020240), 2022-02-12
Supplement: s1 [file s1]

**Table S1.** Owl species, date of sample collection and distribution of the 66 staphylococci among owl samples.

| Scientific name  | Common name | Date    | Recovery center | Isolate recovered                                    |
|------------------|-------------|---------|-----------------|------------------------------------------------------|
| <i>Tyto alba</i> | Barn owl    | 08-2018 | PBG             | <i>S. aureus</i> (VS2976)                            |
| <i>Tyto alba</i> | Barn owl    | 08-2018 | PBG             | <i>S. aureus</i> (VS2981)                            |
| <i>Tyto alba</i> | Barn owl    | 08-2018 | PBG             | <i>S. aureus</i> (VS2973), <i>S. sciuri</i> (VS2988) |
| <i>Tyto alba</i> | Barn owl    | 01-2019 | PBG             | <i>S. sciuri</i> (VS2989)                            |
| <i>Tyto alba</i> | Barn owl    | 03-2019 | PBG             | <i>S. pseudintermedius</i> (VS2983)                  |
| <i>Tyto alba</i> | Barn owl    | 03-2019 | PBG             | <i>S. aureus</i> (VS2977), <i>S. sciuri</i> (VS2991) |
| <i>Tyto alba</i> | Barn owl    | 06-2019 | PBG             | <i>S. sciuri</i> (VS2992)                            |
| <i>Tyto alba</i> | Barn owl    | 07-2019 | PBG             |                                                      |
| <i>Tyto alba</i> | Barn owl    | 11-2019 | PBG             | <i>S. sciuri</i> (VS2993)                            |
| <i>Tyto alba</i> | Barn owl    | 11-2019 | PBG             |                                                      |
| <i>Tyto alba</i> | Barn owl    | 01-2020 | PBG             |                                                      |
| <i>Tyto alba</i> | Barn owl    | 01-2020 | PBG             |                                                      |
| <i>Tyto alba</i> | Barn owl    | 01-2020 | PBG             | <i>S. sciuri</i> (VS3006)                            |
| <i>Tyto alba</i> | Barn owl    | 02-2020 | PBG             |                                                      |
| <i>Tyto alba</i> | Barn owl    | 05-2020 | CERAS           |                                                      |
| <i>Tyto alba</i> | Barn owl    | 05-2020 | CERAS           |                                                      |
| <i>Tyto alba</i> | Barn owl    | 05-2020 | CERAS           |                                                      |
| <i>Tyto alba</i> | Barn owl    | 05-2020 | CERAS           |                                                      |
| <i>Tyto alba</i> | Barn owl    | 05-2020 | CERAS           | <i>S. lentus</i> (VS3014)                            |
| <i>Tyto alba</i> | Barn owl    | 05-2020 | CERAS           |                                                      |
| <i>Tyto alba</i> | Barn owl    | 05-2020 | CERAS           |                                                      |
| <i>Tyto alba</i> | Barn owl    | 05-2020 | CERAS           |                                                      |
| <i>Tyto alba</i> | Barn owl    | 07-2020 | CERAS           | <i>S. vitulinus</i> (VS3018)                         |
| <i>Tyto alba</i> | Barn owl    | 09-2020 | CERAS           |                                                      |
| <i>Tyto alba</i> | Barn owl    | 06-2021 | CERAS           |                                                      |
| <i>Tyto alba</i> | Barn owl    | 06-2021 | CERAS           |                                                      |
| <i>Tyto alba</i> | Barn owl    | 06-2021 | CERAS           | <i>S. saprophyticus</i> (VS3022)                     |
| <i>Tyto alba</i> | Barn owl    | 06-2021 | CERAS           |                                                      |
| <i>Tyto alba</i> | Barn owl    | 06-2021 | CERAS           |                                                      |
| <i>Tyto alba</i> | Barn owl    | 06-2021 | CERAS           |                                                      |
| <i>Tyto alba</i> | Barn owl    | 06-2021 | CERAS           |                                                      |
| <i>Tyto alba</i> | Barn owl    | 06-2021 | CERAS           |                                                      |
| <i>Tyto alba</i> | Barn owl    | 06-2021 | CERAS           |                                                      |
| <i>Tyto alba</i> | Barn owl    | 05-2020 | PBG             |                                                      |
| <i>Tyto alba</i> | Barn owl    | 05-2020 | PBG             |                                                      |
| <i>Tyto alba</i> | Barn owl    | 06-2020 | PBG             |                                                      |

|                      |                    |         |       |                                                                                                                     |
|----------------------|--------------------|---------|-------|---------------------------------------------------------------------------------------------------------------------|
| <i>Tyto alba</i>     | Barn owl           | 06-2020 | PBG   | <i>S. aureus</i> (VS2971)                                                                                           |
| <i>Tyto alba</i>     | Barn owl           | 06-2020 | PBG   | <i>S. aureus</i> (VS2972)                                                                                           |
| <i>Tyto alba</i>     | Barn owl           | 07-2020 | PBG   |                                                                                                                     |
| <i>Tyto alba</i>     | Barn owl           | 07-2020 | PBG   |                                                                                                                     |
| <i>Bubo bubo</i>     | Eurasian eagle-owl | 07-2020 | CERAS | <i>S. haemolyticus</i> (VS3020)                                                                                     |
| <i>Bubo bubo</i>     | Eurasian eagle-owl | 10-2020 | CERAS | <i>S. epidermidis</i> (VS2986)                                                                                      |
| <i>Bubo bubo</i>     | Eurasian eagle-owl | 01-2021 | CERAS | <i>S. sciuri</i> (VS2997)                                                                                           |
| <i>Bubo bubo</i>     | Eurasian eagle-owl | 01-2021 | CERAS |                                                                                                                     |
| <i>Bubo bubo</i>     | Eurasian eagle-owl | 01-2021 | CERAS | <i>S. aureus</i> (VS2974)                                                                                           |
| <i>Athene noctua</i> | Little owl         | 11-2018 | PBG   | <i>S. aureus</i> (VS2975)                                                                                           |
| <i>Athene noctua</i> | Little owl         | 01-2019 | PBG   | <i>S. sciuri</i> (VS3005)                                                                                           |
| <i>Athene noctua</i> | Little owl         | 02-2019 | PBG   | <i>S. aureus</i> (VS2969), <i>S. lentus</i> (VS3016)                                                                |
| <i>Athene noctua</i> | Little owl         | 05-2020 | CERAS | <i>S. sciuri</i> (VS3004)                                                                                           |
| <i>Athene noctua</i> | Little owl         | 06-2020 | CERAS |                                                                                                                     |
| <i>Athene noctua</i> | Little owl         | 06-2020 | CERAS |                                                                                                                     |
| <i>Athene noctua</i> | Little owl         | 06-2020 | CERAS |                                                                                                                     |
| <i>Athene noctua</i> | Little owl         | 06-2020 | CERAS | <i>S. aureus</i> (VS2960)                                                                                           |
| <i>Athene noctua</i> | Little owl         | 06-2020 | CERAS |                                                                                                                     |
| <i>Athene noctua</i> | Little owl         | 06-2020 | CERAS | <i>S. aureus</i> (VS2965)                                                                                           |
| <i>Athene noctua</i> | Little owl         | 06-2020 | CERAS |                                                                                                                     |
| <i>Athene noctua</i> | Little owl         | 06-2020 | CERAS |                                                                                                                     |
| <i>Athene noctua</i> | Little owl         | 07-2020 | CERAS |                                                                                                                     |
| <i>Athene noctua</i> | Little owl         | 07-2020 | CERAS |                                                                                                                     |
| <i>Athene noctua</i> | Little owl         | 07-2020 | CERAS | <i>S. aureus</i> (VS2966)                                                                                           |
| <i>Athene noctua</i> | Little owl         | 07-2020 | CERAS | <i>S. sciuri</i> (VS3001)                                                                                           |
| <i>Athene noctua</i> | Little owl         | 10-2020 | CERAS | <i>S. aureus</i> (VS2967), <i>S. lentus</i> (VS3017), <i>S. vitulinus</i> (VS3019), <i>S. haemolyticus</i> (VS3021) |
| <i>Athene noctua</i> | Little owl         | 05-2021 | CERAS | <i>S. sciuri</i> (VS3000)                                                                                           |
| <i>Athene noctua</i> | Little owl         | 06-2021 | CERAS |                                                                                                                     |
| <i>Athene noctua</i> | Little owl         | 06-2021 | CERAS | <i>S. aureus</i> (VS2980)                                                                                           |
| <i>Athene noctua</i> | Little owl         | 06-2021 | CERAS |                                                                                                                     |
| <i>Athene noctua</i> | Little owl         | 06-2021 | CERAS |                                                                                                                     |
| <i>Athene noctua</i> | Little owl         | 06-2021 | CERAS |                                                                                                                     |
| <i>Athene noctua</i> | Little owl         | 06-2021 | CERAS | <i>S. aureus</i> (VS2970)                                                                                           |
| <i>Athene noctua</i> | Little owl         | 06-2021 | CERAS |                                                                                                                     |
| <i>Strix aluco</i>   | Tawny owl          | 06-2018 | PBG   | <i>S. aureus</i> (VS2961)                                                                                           |
| <i>Strix aluco</i>   | Tawny owl          | 07-2018 | PBG   | <i>S. aureus</i> (VS2962)                                                                                           |
| <i>Strix aluco</i>   | Tawny owl          | 03-2019 | PBG   | <i>S. sciuri</i> (VS2990)                                                                                           |

|                    |           |         |       |                                                                  |
|--------------------|-----------|---------|-------|------------------------------------------------------------------|
| <i>Strix aluco</i> | Tawny owl | 03-2019 | PBG   | <i>S. pseudintermedius</i><br>(VS2984)                           |
| <i>Strix aluco</i> | Tawny owl | 07-2019 | PBG   | <i>S. sciuri</i> (VS2987)                                        |
| <i>Strix aluco</i> | Tawny owl | 01-2020 | PBG   |                                                                  |
| <i>Strix aluco</i> | Tawny owl | 01-2020 | PBG   | <i>S. aureus</i> (VS2963)                                        |
| <i>Strix aluco</i> | Tawny owl | 05-2020 | CERAS |                                                                  |
| <i>Strix aluco</i> | Tawny owl | 05-2020 | CERAS | <i>S. lentus</i> (VS3008), <i>S.</i><br><i>succinus</i> (VS3025) |
| <i>Strix aluco</i> | Tawny owl | 05-2020 | CERAS | <i>S. lentus</i> (VS3009), <i>S.</i><br><i>xylosus</i> (VS3023)  |
| <i>Strix aluco</i> | Tawny owl | 05-2020 | CERAS | <i>S. lentus</i> (VS3012)                                        |
| <i>Strix aluco</i> | Tawny owl | 05-2020 | CERAS | <i>S. sciuri</i> (VS2998)                                        |
| <i>Strix aluco</i> | Tawny owl | 05-2020 | CERAS | <i>S. sciuri</i> (VS2999), <i>S.</i><br><i>lentus</i> (VS3015)   |
| <i>Strix aluco</i> | Tawny owl | 05-2020 | CERAS | <i>S. sciuri</i> (VS2994)                                        |
| <i>Strix aluco</i> | Tawny owl | 05-2020 | CERAS | <i>S. lentus</i> (VS3007)                                        |
| <i>Strix aluco</i> | Tawny owl | 05-2020 | CERAS | <i>S. lentus</i> (VS3013)                                        |
| <i>Strix aluco</i> | Tawny owl | 05-2020 | CERAS | <i>S. aureus</i> (VS2982)                                        |
| <i>Strix aluco</i> | Tawny owl | 05-2020 | CERAS |                                                                  |
| <i>Strix aluco</i> | Tawny owl | 05-2020 | CERAS | <i>S. lentus</i> (VS3011)                                        |
| <i>Strix aluco</i> | Tawny owl | 05-2020 | CERAS |                                                                  |
| <i>Strix aluco</i> | Tawny owl | 05-2020 | CERAS |                                                                  |
| <i>Strix aluco</i> | Tawny owl | 05-2020 | CERAS |                                                                  |
| <i>Strix aluco</i> | Tawny owl | 06-2020 | CERAS | <i>S. aureus</i> (VS2968)                                        |
| <i>Strix aluco</i> | Tawny owl | 09-2020 | CERAS |                                                                  |
| <i>Strix aluco</i> | Tawny owl | 09-2020 | CERAS |                                                                  |
| <i>Strix aluco</i> | Tawny owl | 09-2020 | CERAS | <i>S. sciuri</i> (VS2995)                                        |
| <i>Strix aluco</i> | Tawny owl | 09-2020 | CERAS |                                                                  |
| <i>Strix aluco</i> | Tawny owl | 10-2020 | CERAS | <i>S. xylosus</i> (VS3024)                                       |
| <i>Strix aluco</i> | Tawny owl | 02-2021 | CERAS | <i>S. aureus</i> (VS2978)                                        |
| <i>Strix aluco</i> | Tawny owl | 02-2021 | CERAS | <i>S. sciuri</i> (VS2996)                                        |
| <i>Strix aluco</i> | Tawny owl | 03-2021 | CERAS | <i>S. sciuri</i> (VS3002)                                        |
| <i>Strix aluco</i> | Tawny owl | 03-2021 | CERAS | <i>S. aureus</i> (VS2975); <i>S.</i><br><i>sciuri</i> (VS3003)   |
| <i>Strix aluco</i> | Tawny owl | 03-2021 | CERAS |                                                                  |
| <i>Strix aluco</i> | Tawny owl | 04-2021 | CERAS | <i>S. aureus</i> (VS2964)                                        |
| <i>Strix aluco</i> | Tawny owl | 04-2021 | CERAS |                                                                  |
| <i>Strix aluco</i> | Tawny owl | 05-2021 | CERAS | <i>S. aureus</i> (VS2979)                                        |
| <i>Strix aluco</i> | Tawny owl | 05-2021 | CERAS |                                                                  |
| <i>Strix aluco</i> | Tawny owl | 05-2021 | CERAS |                                                                  |
| <i>Strix aluco</i> | Tawny owl | 05-2021 | CERAS | <i>S. lentus</i> (VS3010)                                        |
| <i>Strix aluco</i> | Tawny owl | 05-2021 | CERAS |                                                                  |
| <i>Strix aluco</i> | Tawny owl | 07-2020 | PBG   |                                                                  |
| <i>Strix aluco</i> | Tawny owl | 06-2018 | PBG   |                                                                  |

|                                                                                            |           |         |     |
|--------------------------------------------------------------------------------------------|-----------|---------|-----|
| <i>Strix aluco</i>                                                                         | Tawny owl | 06-2018 | PBG |
| PBG: Parque Biológico de Gaia, CERAS: Centro de Estudos e Recuperação de Animais Selvagens |           |         |     |
